# Supplementary material for: Preservation of osteoblasts and BM-MSCs biological properties after consecutive passages with the thermal-liftoff method
Source: Royal Society of Chemistry journal article supplement (doi:10.1039/c6ra21946b), 2016-01-01
Supplement: c6ra21946b1.pdf [file c6ra21946b1.pdf]

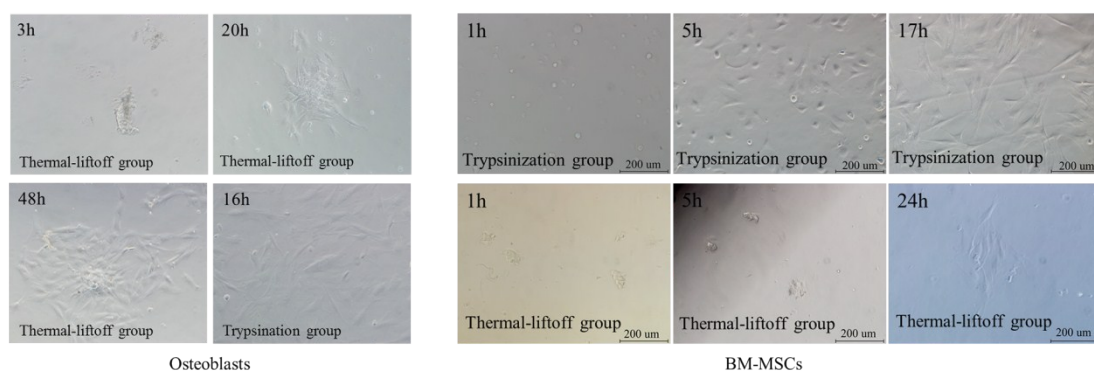

Supporting figure 1. Cell morphology of the detached osteoblasts (P5) and BM-MSCs (P5) after reseeded on tissue plates.
